# Supplementary material
Source: PubMed Central journal article supplement (PMC4098822)
Supplement: Supp_Table1.pdf [file Supp_Table1.pdf]

SUPPLEMENTARY TABLE S1. INTEGRATION EVENTS OF IDLVs IN RAT STRIATA

| Status      | Animal | Sample | DNA  | Reads | Chr | Sequence orientation | IL          | Identity | Genomic length | Upstream of TTS (bp) | In gene distance to TSS (bp) | Intron exon | % in Gene | Downstream of gene | RefSeq gene     | Gene length | Gene orientation | RefSeq ID    | Missing LTR bases |
|-------------|--------|--------|------|-------|-----|----------------------|-------------|----------|----------------|----------------------|------------------------------|-------------|-----------|--------------------|-----------------|-------------|------------------|--------------|-------------------|
| Nonlesioned | 14     | 15     | 877  | 1     | 19  | +                    | 49,172,372  | 99.3     | 142            |                      | 665,199                      | In5         | 62.288    |                    | <i>Cdh13</i>    | 1,067,948   | +                | NM_138889    | 10                |
| Nonlesioned | 14     | 15     | 877  | 2     | 2   | +                    | 77,471,363  | 100      | 128            |                      | 51,847                       | In2         | 35.366    |                    | <i>Fam134b</i>  | 146,602     | +                | NM_001034912 | 1                 |
| Nonlesioned | 14     | 15     | 877  | 1     | 2   | +                    | 77,471,406  | 100      | 85             |                      | 51,890                       | In2         | 35.395    |                    | <i>Fam134b</i>  | 146,602     | +                | NM_001034912 | 20                |
| Nonlesioned | 15     | 21     | 697  | 27    | 10  | -                    | 40,385,868  | 98.48    | 66             |                      | 53,815                       | In25        | 96.6      |                    | <i>Anxa6</i>    | 55,709      | -                | NM_024156    | 0                 |
| Nonlesioned | 15     | 21     | 697  | 1     | 17  | -                    | 51,216,107  | 100      | 4-23 (23)      | 11,165               |                              |             |           |                    | <i>Trim27</i>   | 12,351      | -                | NM_001134974 | 0                 |
| Nonlesioned | 16     | 27     | 1000 | 145   | 1   | -                    | 81,102,788  | 100      | 2-30 (31)      | 79,302               |                              |             |           |                    | <i>Cyp2s1</i>   | 15,023      | -                | NM_001107495 | 0                 |
| Nonlesioned | 16     | 27     | 1000 | 1     | 16  | +                    | 88,133,136  | 100      | 4-23 (24)      | 1,806,159            |                              |             |           |                    | <i>Sic10a2</i>  | 243,838     | +                | NM_017222    | 0                 |
| Nonlesioned | 16     | 27     | 1000 | 5     | 6   | -                    | 47,958,552  | 100      | 81             |                      | 67,188                       | In16        | 94.775    |                    | <i>Tpo</i>      | 70,892      | -                | NM_019353    | 0                 |
| Lesioned    | 6      | 51     | 397  | 3     | 8   | -                    | 69,935,674  | 100      | 3-22 (24)      |                      | 673                          | In1         | 4.868     |                    | <i>Oatz2</i>    | 13,824      | +                | NM_001109899 | 0                 |
| Lesioned    | 7      | 57     | 535  | 1     | 16  | +                    | 20,336,721  | 96.84    | 96             |                      | 8691                         | Ex3         | 87.886    | 71,149             | <i>MGC72612</i> | 13,960      | +                | NM_001009538 | 0                 |
| Lesioned    | 7      | 57     | 535  | 2     | 16  | -                    | 79,570,945  | 95       | 20             |                      |                              |             |           |                    | <i>Cln8</i>     | 9889        | -                | NM_001007686 | 0                 |
| Lesioned    | 7      | 57     | 535  | 1     | 17  | +                    | 35,793,267  | 99.65    | 286            | 275,621              |                              |             |           |                    | <i>Cdh1</i>     | 227,392     | -                | NM_001014145 | 0                 |
| Lesioned    | 7      | 57     | 535  | 1     | 17  | +                    | 69,041,211  | 100      | 20             |                      | 82,169                       | In2         | 14.027    | 19,972             | <i>Ryr2</i>     | 585,775     | +                | NM_032078    | 0                 |
| Lesioned    | 7      | 57     | 535  | 1     | 3   | -                    | 56,124,081  | 100      | 20             |                      |                              |             |           |                    | <i>Chn1</i>     | 42,613      | -                | NM_032083    | 0                 |
| Lesioned    | 7      | 57     | 535  | 1     | 4   | +                    | 114,228,958 | 100      | 92             |                      | 85,027                       | In1         | 10.668    |                    | <i>Lrrm4</i>    | 79,7018     | +                | NM_001134746 | 0                 |
| Lesioned    | 7      | 57     | 535  | 1     | 23  | -                    | 79,829,941  | 100      | 3-25 (35)      | 382,941              |                              |             |           |                    | <i>Mageb18</i>  | 2253        | -                | NM_001044246 | 0                 |
| Lesioned    | 8      | 63     | 904  | 2032  | 2   | -                    | 220,111,914 | 98.57    | 2-281 (281)    |                      | 4653                         | In4         | 29.554    |                    | <i>Mettl14</i>  | 15,744      | -                | NM_001106470 | 0                 |

Chr, chromosome; IDLV, integration-deficient lentiviral vector; IL, integration locus; In, intron; Ex, exon; TSS, transcription start site.
